# Supplementary material for: Glucagon-like peptide-1 mimetics, optimal for Asian type 2 diabetes patients with and without overweight/obesity: meta-analysis of randomized controlled trials
Source: PubMed Central journal article supplement (PMC5700049; doi:10.1038/s41598-017-16018-9), 2017-11-22
Supplement: 41598_2017_16018_MOESM1_ESM.pdf [file 41598_2017_16018_MOESM1_ESM.pdf]

**Glucagon-like peptide-1 mimetics, optimal for Asian type 2 diabetes patients with and without overweight/obesity: meta-analysis of randomized controlled trials**

Fang Zhang, Lizhi Tang, Yuwei Zhang, Qingguo Lü, Nanwei Tong\*

\*Corresponding author

Table S1. Risk of bias assessment for the included studies

| <b>study</b>               | <b>Random sequence generation</b> | <b>Allocation concealment</b> | <b>Blinding of participants and personnel</b> | <b>Blinding outcome assessment</b> | <b>Incomplete outcome data</b> | <b>Selective reporting</b> | <b>Other bias</b> |
|----------------------------|-----------------------------------|-------------------------------|-----------------------------------------------|------------------------------------|--------------------------------|----------------------------|-------------------|
| Araki et al. 2015 [17]     | low risk                          | low risk                      | high risk                                     | high risk                          | low risk                       | low risk                   | low risk          |
| Xu et al. 2014 [24]        | low risk                          | unclear                       | high risk                                     | high risk                          | low risk                       | low risk                   | low risk          |
| Chen et al. 2017 [18]      | low risk                          | low risk                      | low risk                                      | low risk                           | low risk                       | low risk                   | low risk          |
| Gao et al. 2009 [25]       | low risk                          | unclear                       | low risk                                      | low risk                           | low risk                       | low risk                   | low risk          |
| Inagaki et al. 2012 [26]   | low risk                          | low risk                      | high risk                                     | high risk                          | low risk                       | low risk                   | low risk          |
| Kadowaki et al. 2011 [27]  | low risk                          | low risk                      | low risk                                      | low risk                           | low risk                       | low risk                   | low risk          |
| Kadowaki et al. 2009 [38]  | low risk                          | unclear                       | low risk                                      | low risk                           | low risk                       | low risk                   | low risk          |
| Kaku et al. 2010 [39]      | low risk                          | unclear                       | low risk                                      | low risk                           | low risk                       | low risk                   | low risk          |
| Ke et al. 2015 [13]        | low risk                          | unclear                       | high risk                                     | high risk                          | high risk                      | low risk                   | low risk          |
| Li et al. 2012 [28]        | low risk                          | unclear                       | high risk                                     | high risk                          | high risk                      | low risk                   | low risk          |
| Li et al. 2014 [29]        | low risk                          | unclear                       | low risk                                      | low risk                           | low risk                       | low risk                   | low risk          |
| Miyagawa et al. 2015 [30]  | low risk                          | low risk                      | low risk                                      | low risk                           | low risk                       | low risk                   | low risk          |
| Seino et al. 2012 [31]     | low risk                          | unclear                       | low risk                                      | low risk                           | low risk                       | low risk                   | low risk          |
| Seino et al. 2016 [32]     | low risk                          | unclear                       | low risk                                      | low risk                           | low risk                       | low risk                   | low risk          |
| Shi et al. 2017 [14]       | low risk                          | unclear                       | high risk                                     | high risk                          | high risk                      | low risk                   | low risk          |
| Takeshita et al. 2015 [33] | low risk                          | low risk                      | high risk                                     | high risk                          | high risk                      | low risk                   | low risk          |
| Tanaka et al. 2015 [15]    | low risk                          | unclear                       | high risk                                     | high risk                          | high risk                      | low risk                   | low risk          |
| Terauchi et al. 2014 [19]  | low risk                          | unclear                       | low risk                                      | low risk                           | low risk                       | low risk                   | low risk          |
| Yang et al. 2011 [34]      | low risk                          | unclear                       | low risk                                      | low risk                           | high risk                      | low risk                   | low risk          |
| Yoon et al. 2017 [16]      | low risk                          | unclear                       | high risk                                     | high risk                          | low risk                       | low risk                   | low risk          |

Table S1. Continued

| <b>Study</b>            | <b>Random<br/>sequence<br/>generation</b> | <b>Allocation<br/>concealment</b> | <b>Blinding of<br/>participants and<br/>personnel</b> | <b>Blinding outcome<br/>assessment</b> | <b>Incomplete<br/>outcome data</b> | <b>Selective<br/>reporting</b> | <b>Other bias</b> |
|-------------------------|-------------------------------------------|-----------------------------------|-------------------------------------------------------|----------------------------------------|------------------------------------|--------------------------------|-------------------|
| Pan et al. 2014 [35]    | low risk                                  | unclear                           | low risk                                              | low risk                               | low risk                           | low risk                       | low risk          |
| Yuan et al. 2012 [36]   | low risk                                  | unclear                           | high risk                                             | high risk                              | low risk                           | low risk                       | low risk          |
| Zang et al. 2016 [37]   | low risk                                  | low risk                          | high risk                                             | high risk                              | low risk                           | low risk                       | low risk          |
| Inoue et al. 2015 [20]  | unclear                                   | unclear                           | high risk                                             | high risk                              | low risk                           | low risk                       | low risk          |
| Onishi et al. 2015 [21] | unclear                                   | low risk                          | low risk                                              | low risk                               | low risk                           | low risk                       | low risk          |
| Seino et al. 2010 [22]  | low risk                                  | unclear                           | low risk                                              | low risk                               | low risk                           | low risk                       | low risk          |
| Seino et al. 2008 [23]  | low risk                                  | low risk                          | low risk                                              | low risk                               | low risk                           | low risk                       | low risk          |
| Ji et al. 2013 [12]     | low risk                                  | unclear                           | high risk                                             | high risk                              | low risk                           | low risk                       | low risk          |

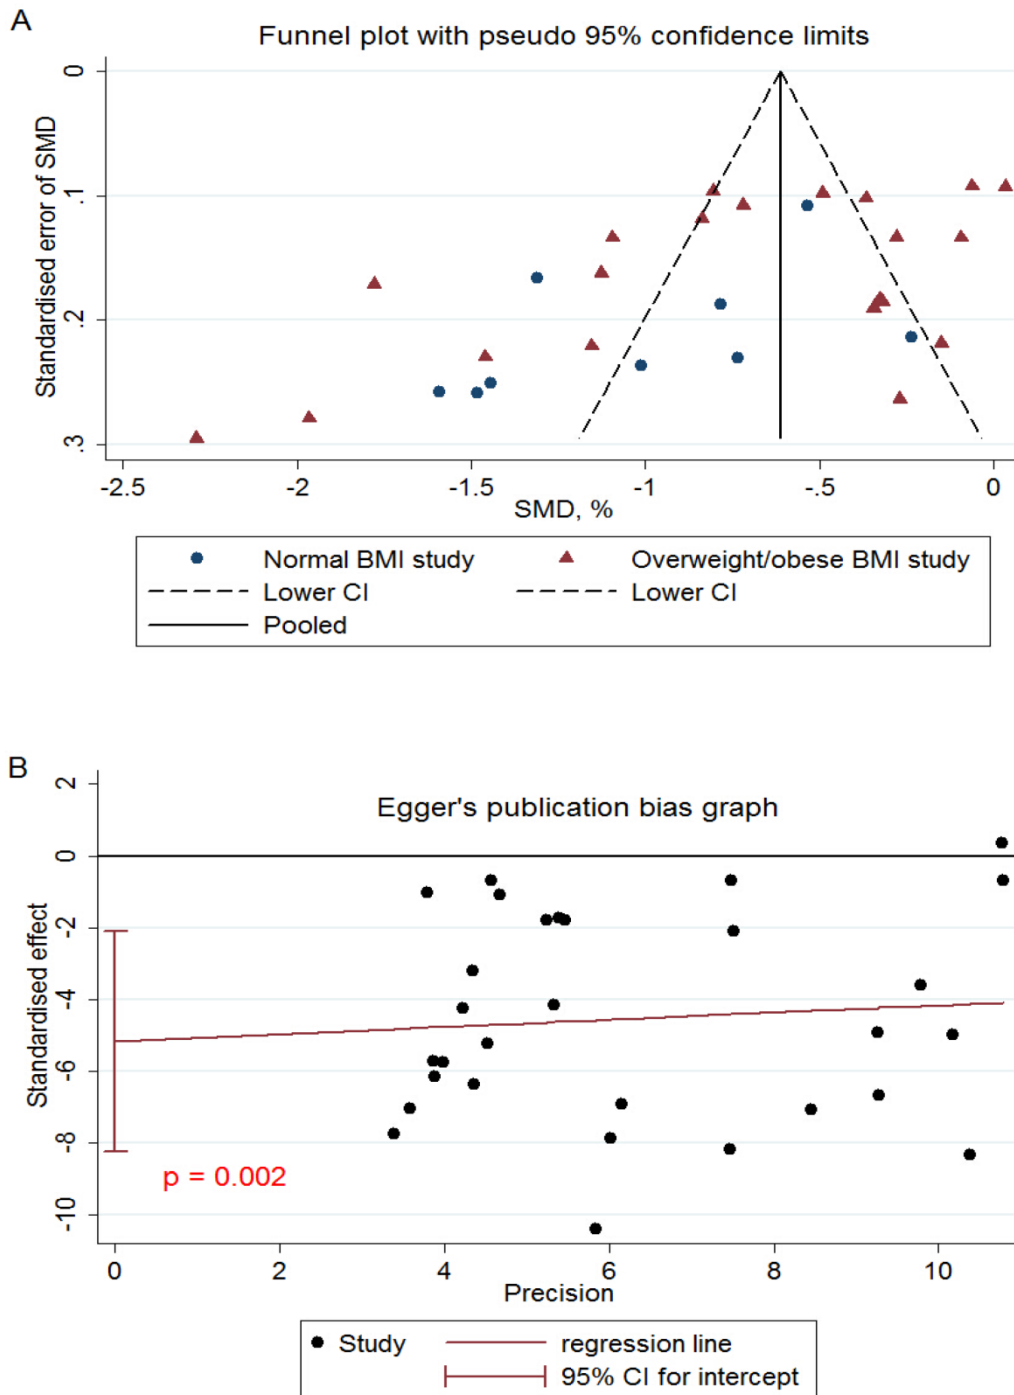

Fig. S1. Funnel plot and Egger's test graph of HbA1c change in meta-analysis. (A) Funnel plot; (B) Egger's test graph. \*Studies with subgroups of diverse-dose GLP-1RA treatments or varied controlled agents were divided into respective comparison pairs: each pair included only one dose GLP-1RA versus one controlled comparator.

**A**

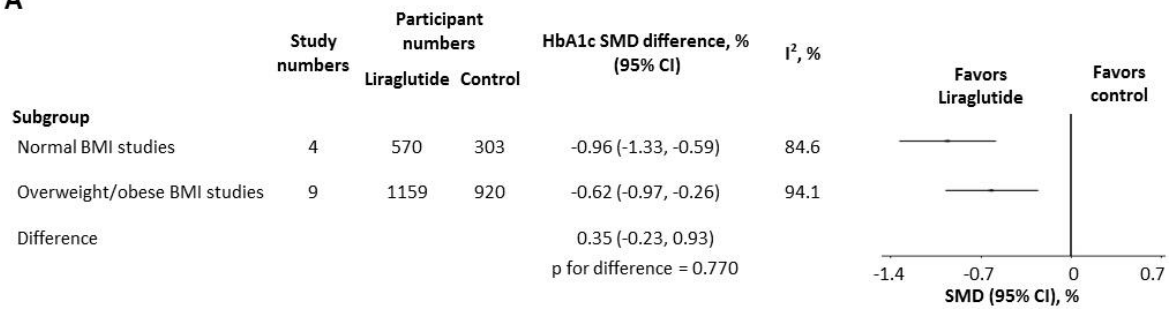

**B**

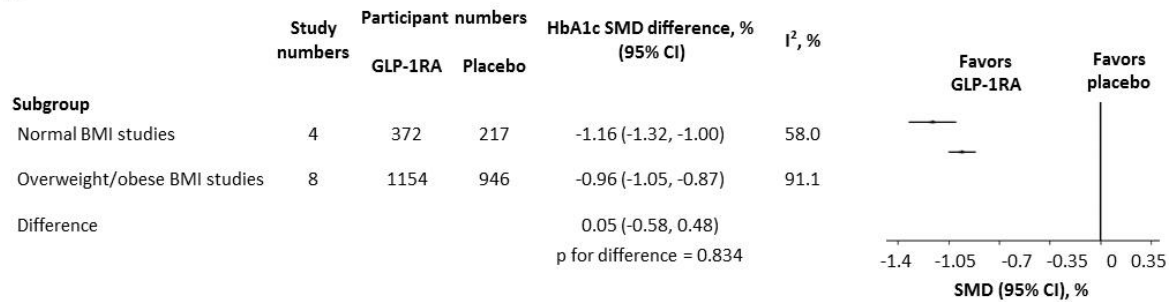

**C**

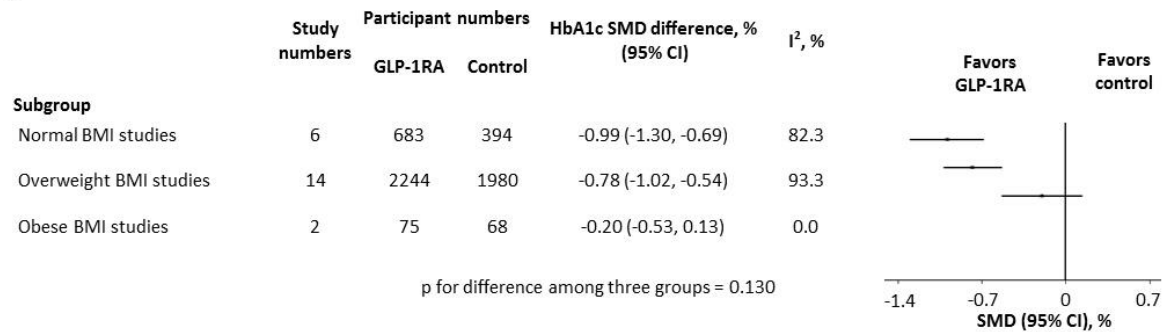

**D**

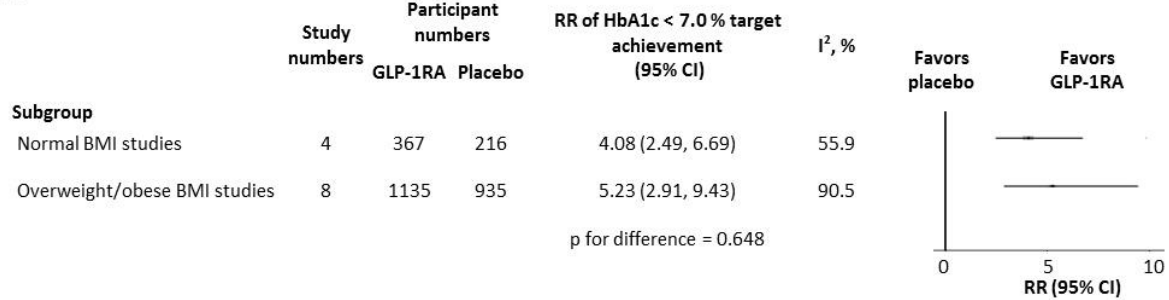

**E**

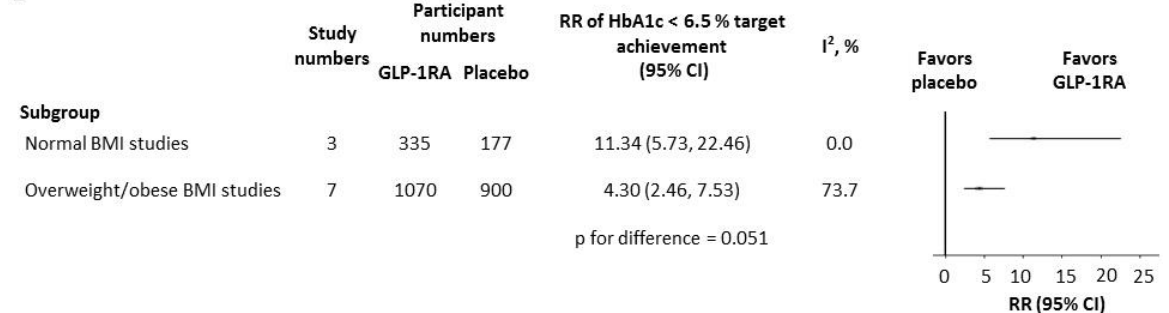

**F**

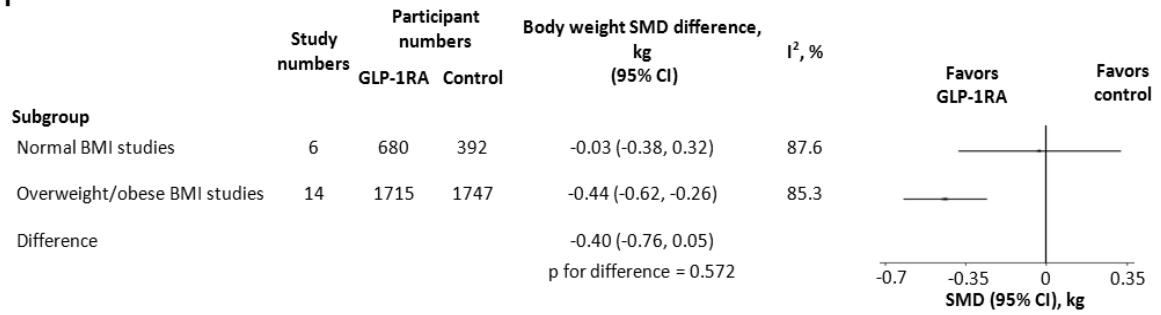

Fig. S2. Comparisons between normal BMI Asian studies and overweight/obese BMI Asian studies in (A) HbA1c change in liraglutide research, (B) HbA1c change in placebo-controlled studies, (C) HbA1c change in three BMI groups, (D) relative risk of HbA1c < 7.0% target achievement in placebo-controlled research, (E) relative risk of HbA1c < 6.5% target achievement in placebo-controlled research and (F) body weight change. BMI, body mass index; GLP-1RA, glucagon-like peptide-1 receptor agonist; SMD, standardized mean difference; CI, confidence interval; RR, relative risk.
